# Supplementary material for: Persistent growth of anthropogenic NMVOC emissions in Chinaduring 1990–2017: dynamics, speciation, and ozone formationpotentials
Source: Copernicus journal article supplement (doi:10.5194/acp-2019-125), 2019-03-12
Supplement: Supplementary file 1 [file acp-2019-125-supplement.zip]

*Supplement Information of*

**Persistent growth of anthropogenic NMVOC emissions in China during 1990-2017: dynamics, speciation, and ozone formation potentials**

Meng Li<sup>[1,2]</sup>, Qiang Zhang<sup>[1]</sup>, Bo Zheng<sup>[3]</sup>, Dan Tong<sup>[1]</sup>, Yu Lei<sup>[4]</sup>, Fei Liu<sup>[3]</sup>, Chaopeng Hong<sup>[1]</sup>, Sicong Kang<sup>[3]</sup>, Liu Yan<sup>[1]</sup>, Yuxuan Zhang<sup>[1]</sup>, Yu Bo<sup>[6]</sup>, Hang Su<sup>[5,2]</sup>, Yafang Cheng<sup>[5,2]</sup> and Kebin He<sup>[3,1]</sup>

[1] {Ministry of Education Key Laboratory for Earth System Modeling, Department of Earth System Science, Tsinghua University, Beijing 100084, China}

[2] {Max Planck Institute for Chemistry, Mainz 55128, Germany}

[3] {State Key Joint Laboratory of Environment Simulation and Pollution Control, School of Environment, Tsinghua University, Beijing 100084, China}

[4] {China Academy for Environmental Planning, Beijing 100012, China}

[5] {Center for Air Pollution and Climate Change Research, Jinan University, 511443 Guangzhou, China}

[6] {Key Laboratory of Regional Climate-Environment for Temperate East Asia, Institute of Atmospheric Physics, Chinese Academy of Science, Beijing 100029, China}

*Correspondence to:*

Qiang Zhang ([qiangzhang@tsinghua.edu.cn](mailto:qiangzhang@tsinghua.edu.cn))

## **Contents**

Table S1. Activity rate, emission factor, and source profile by source categories (TableS1\_VOC\_trend. xlsx).

Figure S1. Uncertainties of mass fractions by species and subsectors in source profiles.

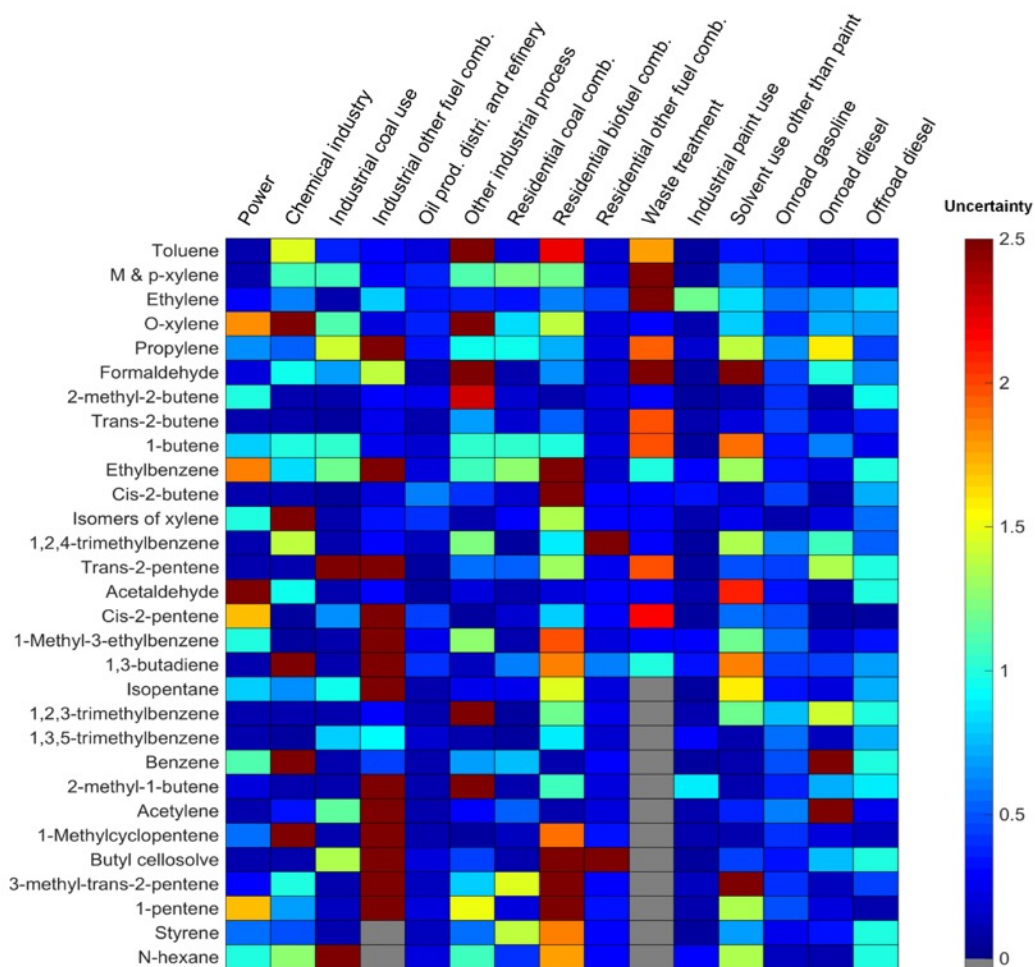

**Figure S1. Uncertainties of mass fractions by species and subsectors in source profiles.**
